# Supplementary material for: Synthesis of Functionalized Thiophene Based Pyrazole Amides via Various Catalytic Approaches: Structural Features through Computational Applications and Nonlinear Optical Properties
Source: MDPI journal article supplement (doi:10.3390/molecules27020360), 2022-01-07
Supplement: s1 [file s1]

## Supplementary Data

### Synthesis of functionalized thiophene based pyrazole amides *via* various catalytic approaches: Structural features through Computational applications and Nonlinear optical properties

Iram Kanwal<sup>1</sup>, Nasir Rasool<sup>1,\*</sup>, Syeda Huda Mehdi Zaidi<sup>2</sup>, Zainul Amiruddin Zakaria<sup>3,4,\*</sup>, Muhammad Bilal<sup>1</sup>, Muhammad Ali Hashmi<sup>2</sup>, Adeel Mubarik<sup>1</sup>, Gulraiz Ahmad<sup>1</sup>, Syed Adnan Ali Shah<sup>5,6</sup>

<sup>1</sup> Department of Chemistry, Government College, University Faisalabad, 38000, Pakistan; [iramchemist117@gmail.com](mailto:iramchemist117@gmail.com) (I.R.), [nasirrasool@gcuf.edu.pk](mailto:nasirrasool@gcuf.edu.pk) (N.R.), [muhammadbilalgcuf@gmail.com](mailto:muhammadbilalgcuf@gmail.com) (M.B.), [adeelmubarik2@gmail.com](mailto:adeelmubarik2@gmail.com) (A.M.), [gulchemist35@gmail.com](mailto:gulchemist35@gmail.com) (G.A.)

<sup>2</sup> Department of Chemistry, Division of Science & Technology, University of Education, Lahore, 54770, Pakistan; [hudazaidi36@gmail.com](mailto:hudazaidi36@gmail.com) (S.H.M.Z.), [muhammad.hashmi@ue.edu.pk](mailto:muhammad.hashmi@ue.edu.pk) (M.A.H.)

<sup>3</sup> Department of Biomedical Sciences, Faculty of Medicine and Health Sciences, Universiti Malaysia Sabah, Jalan UMS, 88400 Kota Kinabalu, Sabah, Malaysia; [drzazakaria@gmail.com](mailto:drzazakaria@gmail.com) (Z.A.Z.)

<sup>4</sup> Halal Product Development Unit, Halal Product Research Institute, Universiti Putra Malaysia, 43400 UPM Serdang, Selangor, Malaysia

<sup>5</sup> Faculty of Pharmacy, Universiti Teknologi MARA Cawangan Selangor Kampus Puncak Alam, Bandar Puncak Alam 42300, Selangor D. E., Malaysia; [syedadnan@uitm.edu.my](mailto:syedadnan@uitm.edu.my) (S.A.A.S)

<sup>6</sup> Atta-ur-Rahman Institute for Natural Products Discovery (AuRIns), Universiti Teknologi MARA Cawangan Selangor Kampus Puncak Alam, Bandar Puncak Alam 42300, Selangor D. E., Malaysia

\* Correspondence: [nasirrasool@gcuf.edu.pk](mailto:nasirrasool@gcuf.edu.pk), (N.R.); Tel.: +92-332-7491790 (N.R.); [drzazakaria@gmail.com](mailto:drzazakaria@gmail.com), (Z.A.Z.); Tel.: +6019-2117090 (Z.A.Z.)

## Table of Contents

|                                                                                           |    |
|-------------------------------------------------------------------------------------------|----|
| Table S1: Comparison of Experimental and Computed NMR data for compound 9b .....          | 3  |
| Table S2: Comparison of Experimental and Computed NMR data for compound 9c .....          | 4  |
| Table S3: Comparison of Experimental and Computed NMR data for compound 9d .....          | 5  |
| Table S4: Comparison of Experimental and Computed NMR data for compound 9e .....          | 6  |
| Table S5: Comparison of Experimental and Computed NMR data for compound 9g .....          | 7  |
| Table S6: Comparison of Experimental and Computed NMR data for compound 9h .....          | 8  |
| Table S7: Comparison of Experimental and Computed NMR data for compound 3 .....           | 9  |
| Table S8: Comparison of Experimental and Computed NMR data for compound 5 .....           | 10 |
| Table S9: Comparison of Experimental and Computed NMR data for compound 6 .....           | 10 |
| Table S10: Comparison of Experimental and Computed NMR data for compound 7 .....          | 11 |
|                                                                                           |    |
| Figure S1: <sup>1</sup> H NMR (600 MHz, DMSO) of compound 3.....                          | 12 |
| Figure S2: <sup>1</sup> H NMR (600 MHz, DMSO) of compound 7.....                          | 12 |
| Figure S3: <sup>1</sup> H NMR (600 MHz, DMSO) of compound 9a.....                         | 13 |
| Figure S4: <sup>1</sup> H NMR (600 MHz, DMSO) of compound 9b. ....                        | 14 |
| Figure S5: <sup>1</sup> H NMR (600 MHz, DMSO) of compound 9d. ....                        | 15 |
| Figure S6: <sup>1</sup> H NMR (600 MHz, DMSO) of compound 9e.....                         | 16 |
| Figure S7: <sup>1</sup> H NMR (600 MHz, DMSO) of compound 9g.....                         | 17 |
| Figure S8: <sup>1</sup> H NMR (600 MHz, DMSO) of compound 9h .....                        | 17 |
| Figure S9: UV-Vis spectrum (Calculated at TD-DFT/PBE0/def2TZVPDMSO) of compound 9a .....  | 18 |
| Figure S10: UV-Vis spectrum (Calculated at TD-DFT/PBE0/def2TZVPDMSO) of compound 9b.....  | 18 |
| Figure S11: UV-Vis spectrum (Calculated at TD-DFT/PBE0/def2TZVPDMSO) of compound 9c ..... | 19 |
| Figure S12: UV-Vis spectrum (Calculated at TD-DFT/PBE0/def2TZVPDMSO) of compound 9d.....  | 19 |
| Figure S13: UV-Vis spectrum (Calculated at TD-DFT/PBE0/def2TZVPDMSO) of compound 9e ..... | 20 |
| Figure S14: UV-Vis spectrum (Calculated at TD-DFT/PBE0/def2TZVPDMSO) of compound 9f.....  | 20 |
| Figure S15: UV-Vis spectrum (Calculated at TD-DFT/PBE0/def2TZVPDMSO) of compound 9g ..... | 21 |
| Figure S16: UV-Vis spectrum (Calculated at TD-DFT/PBE0/def2TZVPDMSO) of compound 9h ..... | 21 |
| Figure S17: Representation of Frontier Orbitals of the Molecules .....                    | 22 |

**Table S1:** Comparison of Experimental and Computed NMR data for compound **9b**

| Compound <b>9b</b>                   |                 |                             |          |         |  |
|--------------------------------------|-----------------|-----------------------------|----------|---------|--|
| Carbon No.                           | Carbon Type     | <sup>1</sup> H-NMR (δ, ppm) |          | Δδ, ppm |  |
|                                      |                 | Experimental                | Computed |         |  |
| 2                                    | C               | -                           | -        | -       |  |
| 3                                    | CH              | 8.06                        | 6.56     | 1.50    |  |
| 4                                    | CH              | 7.50                        | 7.61     | -0.11   |  |
| 5                                    | C               | -                           | -        | -       |  |
| 1'N                                  | NH              | 12.15                       | 9.65     | 2.50    |  |
| 3'                                   | C               | -                           | -        | -       |  |
| 4'                                   | CH              | 6.37                        | 5.97     | 0.40    |  |
| 5'                                   | C               | -                           | -        | -       |  |
| 5'-Me                                | CH <sub>3</sub> | 2.23                        | 2.19     | 0.04    |  |
| 1"                                   | C               | -                           | -        | -       |  |
| 2"                                   | CH              | 7.72                        | 8.21     | -0.49   |  |
| 3"                                   | CH              | 7.89                        | 8.33     | -0.44   |  |
| 4"                                   | C               | -                           | -        | -       |  |
| 4"-COMe                              | CH <sub>3</sub> | 3.88                        | 3.72     | 0.16    |  |
| 5"                                   | CH              | 7.89                        | 8.47     | -0.58   |  |
| 6"                                   | CH              | 7.72                        | 8.10     | -0.38   |  |
| Mean Absolute Error (MAE) = 0.28     |                 |                             |          |         |  |
| Root Mean Square Error (RMSE) = 0.63 |                 |                             |          |         |  |

**Table S2:** Comparison of Experimental and Computed NMR data for compound **9c**

| Compound <b>9c</b>                   |                 |                             |          |         |  |
|--------------------------------------|-----------------|-----------------------------|----------|---------|--|
| Carbon No.                           | Carbon Type     | <sup>1</sup> H-NMR (δ, ppm) |          | Δδ, ppm |  |
|                                      |                 | Experimental                | Computed |         |  |
| 2                                    | C               | -                           | -        | -       |  |
| 3                                    | CH              | 8.06                        | 6.45     | 1.61    |  |
| 4                                    | CH              | 7.50                        | 7.31     | 0.19    |  |
| 5                                    | C               | -                           | -        | -       |  |
| 1'N                                  | NH              | 12.12                       | 9.66     | 2.46    |  |
| 3'                                   | C               | -                           | -        | -       |  |
| 4'                                   | CH              | 6.36                        | 6.00     | 0.36    |  |
| 5'                                   | C               | -                           | -        | -       |  |
| 5'-Me                                | CH <sub>3</sub> | 2.23                        | 2.20     | 0.03    |  |
| 1"                                   | C               | -                           | -        | -       |  |
| 2"                                   | CH              | 7.26                        | 7.93     | -0.67   |  |
| 3"                                   | CH              | 7.62                        | 7.11     | 0.51    |  |
| 4"                                   | C               | -                           | -        | -       |  |
| 4"-OMe                               | CH <sub>3</sub> | 2.37                        | 3.71     | -1.34   |  |
| 5"                                   | CH              | 7.62                        | 7.21     | 0.41    |  |
| 6"                                   | CH              | 7.26                        | 8.13     | -0.87   |  |
| Mean Absolute Error (MAE) = 0.35     |                 |                             |          |         |  |
| Root Mean Square Error (RMSE) = 0.71 |                 |                             |          |         |  |

**Table S3:** Comparison of Experimental and Computed NMR data for compound **9d**

| Compound <b>9d</b>                   |                 |                                             |                                         |         |  |
|--------------------------------------|-----------------|---------------------------------------------|-----------------------------------------|---------|--|
| Carbon No.                           | Carbon Type     | <sup>1</sup> H-NMR (δ, ppm)<br>Experimental | <sup>1</sup> H-NMR (δ, ppm)<br>Computed | Δδ, ppm |  |
| 2                                    | C               | -                                           | -                                       | -       |  |
| 3                                    | CH              | 8.40                                        | 6.52                                    | 1.88    |  |
| 4                                    | CH              | 7.70                                        | 7.52                                    | 0.18    |  |
| 5                                    | C               | -                                           | -                                       | -       |  |
| 1'N                                  | NH              | 12.14                                       | 9.66                                    | 2.48    |  |
| 3'                                   | C               | -                                           | -                                       | -       |  |
| 4'                                   | CH              | 6.37                                        | 5.99                                    | 0.38    |  |
| 5'                                   | C               | -                                           | -                                       | -       |  |
| 5'-Me                                | CH <sub>3</sub> | 2.23                                        | 2.20                                    | 0.03    |  |
| 1"                                   | C               | -                                           | -                                       | -       |  |
| 2"                                   | CH              | 7.98                                        | 8.04                                    | -0.06   |  |
| 3"                                   | CH              | 7.98                                        | 7.54                                    | 0.44    |  |
| 4"                                   | C               | -                                           | -                                       | -       |  |
| 4"-COMe                              | CH <sub>3</sub> | 2.66                                        | 2.35                                    | 0.31    |  |
| 5"                                   | CH              | 7.98                                        | 7.71                                    | 0.27    |  |
| 6"                                   | CH              | 7.98                                        | 7.96                                    | 0.02    |  |
| Mean Absolute Error (MAE) = 0.25     |                 |                                             |                                         |         |  |
| Root Mean Square Error (RMSE) = 0.65 |                 |                                             |                                         |         |  |

**Table S4:** Comparison of Experimental and Computed NMR data for compound **9e**

| Compound <b>9e</b>                   |                 |                                             |                                         |         |  |
|--------------------------------------|-----------------|---------------------------------------------|-----------------------------------------|---------|--|
| Carbon No.                           | Carbon Type     | <sup>1</sup> H-NMR (δ, ppm)<br>Experimental | <sup>1</sup> H-NMR (δ, ppm)<br>Computed | Δδ, ppm |  |
| 2                                    | C               | -                                           | -                                       | -       |  |
| 3                                    | CH              | 8.04                                        | 7.34                                    | 0.70    |  |
| 4                                    | CH              | 7.89                                        | 7.45                                    | 0.44    |  |
| 5                                    | C               | -                                           | -                                       | -       |  |
| 1'N                                  | NH              | 12.14                                       | 9.18                                    | 2.96    |  |
| 3'                                   | C               | -                                           | -                                       | -       |  |
| 4'                                   | CH              | 6.35                                        | 5.71                                    | 0.64    |  |
| 5'                                   | C               | -                                           | -                                       | -       |  |
| 5'-Me                                | CH <sub>3</sub> | 2.22                                        | 2.11                                    | 0.11    |  |
| 2''                                  | CH              | 7.67                                        | 7.96                                    | -0.29   |  |
| 3''                                  | C               | -                                           | -                                       | -       |  |
| 4''                                  | CH              | 7.43                                        | 7.89                                    | -0.46   |  |
| Mean Absolute Error (MAE) = 0.24     |                 |                                             |                                         |         |  |
| Root Mean Square Error (RMSE) = 0.65 |                 |                                             |                                         |         |  |

**Table S5:** Comparison of Experimental and Computed NMR data for compound **9g**

| Compound <b>9g</b>                   |                 |                                             |                                         |         |
|--------------------------------------|-----------------|---------------------------------------------|-----------------------------------------|---------|
| Carbon No.                           | Carbon Type     | <sup>1</sup> H-NMR (δ, ppm)<br>Experimental | <sup>1</sup> H-NMR (δ, ppm)<br>Computed | Δδ, ppm |
| 2                                    | C               | -                                           | -                                       | -       |
| 3                                    | CH              | 8.05                                        | 6.69                                    | 1.36    |
| 4                                    | CH              | 7.50                                        | 7.43                                    | 0.07    |
| 5                                    | C               | -                                           | -                                       | -       |
| 1'N                                  | NH              | 12.12                                       | 9.51                                    | 2.61    |
| 3'                                   | C               | -                                           | -                                       | -       |
| 4'                                   | CH              | 6.36                                        | 5.87                                    | 0.49    |
| 5'                                   | C               | -                                           | -                                       | -       |
| 5'-Me                                | CH <sub>3</sub> | 2.23                                        | 2.15                                    | 0.08    |
| 1''                                  | C               | -                                           | -                                       | -       |
| 2''                                  | CH              | 7.34                                        | 7.78                                    | -0.44   |
| 3''                                  | C               | -                                           | -                                       | -       |
| 3''-Me                               | CH <sub>3</sub> | 2.32                                        | 2.32                                    | 0.00    |
| 4''                                  | CH              | 7.02                                        | 7.29                                    | -0.27   |
| 5''                                  | C               | -                                           | -                                       | -       |
| 5''-Me                               | CH <sub>3</sub> | 2.32                                        | 2.33                                    | -0.01   |
| 6''                                  | CH              | 7.34                                        | 7.68                                    | -0.34   |
| Mean Absolute Error (MAE) = 0.24     |                 |                                             |                                         |         |
| Root Mean Square Error (RMSE) = 0.62 |                 |                                             |                                         |         |

**Table S6:** Comparison of Experimental and Computed NMR data for compound **9h**

| Compound <b>9h</b>                   |                 |                             |          |         |  |
|--------------------------------------|-----------------|-----------------------------|----------|---------|--|
| Carbon No.                           | Carbon Type     | <sup>1</sup> H-NMR (δ, ppm) |          | Δδ, ppm |  |
|                                      |                 | Experimental                | Computed |         |  |
| 2                                    | C               | -                           | -        | -       |  |
| 3                                    | CH              | 8.09                        | 6.67     | 1.42    |  |
| 4                                    | CH              | 7.40                        | 7.57     | -0.17   |  |
| 5                                    | C               | -                           | -        | -       |  |
| 1'N                                  | NH              | 12.15                       | 9.54     | 2.61    |  |
| 3'                                   | C               | -                           | -        | -       |  |
| 4'                                   | CH              | 6.36                        | 5.88     | 0.48    |  |
| 5'                                   | C               | -                           | -        | -       |  |
| 5'-Me                                | CH <sub>3</sub> | 2.23                        | 2.16     | 0.07    |  |
| 1"                                   | C               | -                           | -        | -       |  |
| 2"                                   | CH              | 7.26                        | 7.72     | -0.46   |  |
| 3"                                   | C               | -                           | -        | -       |  |
| 4"                                   | CH              | 6.98                        | 6.97     | 0.01    |  |
| 5"                                   | C               | -                           | -        | -       |  |
| 6"                                   | CH              | 7.11                        | 7.48     | -7.48   |  |
| Mean Absolute Error (MAE) = 0.53     |                 |                             |          |         |  |
| Root Mean Square Error (RMSE) = 2.19 |                 |                             |          |         |  |



**Table S7:** Comparison of Experimental and Computed NMR data for compound 3

| Compound <b>3</b>                    |                 |                             |          |         |  |
|--------------------------------------|-----------------|-----------------------------|----------|---------|--|
| Carbon No.                           | Carbon Type     | <sup>1</sup> H-NMR (δ, ppm) |          | Δδ, ppm |  |
|                                      |                 | Experimental                | Computed |         |  |
| 2                                    | C               | -                           | -        | -       |  |
| 3                                    | CH              | 7.32                        | 6.53     | 0.79    |  |
| 4                                    | CH              | 7.67                        | 7.02     | 0.65    |  |
| 5                                    | C               | -                           | -        | -       |  |
| 3'                                   | C               | -                           | -        | -       |  |
| 3'-Me                                | CH <sub>3</sub> | 2.25                        | 2.24     | 4.03    |  |
| 4'                                   | CH              | 6.27                        | 2.24     | -2.24   |  |
| 5'                                   | C               | -                           | -        | -       |  |
| 1''                                  | C               | -                           | -        | -       |  |
| 2''                                  | CH              | 7.50                        | 7.95     | -0.45   |  |
| 3''                                  | CH              | 7.44                        | 7.72     | -0.28   |  |
| 4''                                  | CH              | 7.34                        | 7.70     | -0.36   |  |
| 5''                                  | CH              | 7.44                        | 7.89     | -0.45   |  |
| 6''                                  | CH              | 7.50                        | 7.97     | -0.53   |  |
| Mean Absolute Error (MAE) = 0.42     |                 |                             |          |         |  |
| Root Mean Square Error (RMSE) = 0.98 |                 |                             |          |         |  |

**Table S8:** Comparison of Experimental and Computed NMR data for compound 5

| Compound <b>5</b>                    |                                 |                                             |                                         |         |
|--------------------------------------|---------------------------------|---------------------------------------------|-----------------------------------------|---------|
| Carbon No.                           | Carbon Type                     | <sup>1</sup> H-NMR (δ, ppm)<br>Experimental | <sup>1</sup> H-NMR (δ, ppm)<br>Computed | Δδ, ppm |
| 1 N-COOC(Me) <sub>3</sub>            | (CH <sub>3</sub> ) <sub>3</sub> | 1.37                                        | 1.40                                    | -0.03   |
| 3                                    | C                               | -                                           | -                                       | 0.00    |
| 3-NH <sub>2</sub>                    | NH <sub>2</sub>                 | 6.01                                        | 3.94                                    | 2.07    |
| 4                                    | CH                              | 6.52                                        | 5.70                                    | 0.82    |
| 5                                    | C                               | -                                           | -                                       | 0.00    |
| 5-Me                                 | CH <sub>3</sub>                 | 2.46                                        | 2.26                                    | 0.20    |
| Mean Absolute Error (MAE) = 0.13     |                                 |                                             |                                         |         |
| Root Mean Square Error (RMSE) = 0.45 |                                 |                                             |                                         |         |

**Table S9:** Comparison of Experimental and Computed NMR data for compound 6

| Compound <b>6</b>                    |                                 |                                             |                                         |         |
|--------------------------------------|---------------------------------|---------------------------------------------|-----------------------------------------|---------|
| Carbon No.                           | Carbon Type                     | <sup>1</sup> H-NMR (δ, ppm)<br>Experimental | <sup>1</sup> H-NMR (δ, ppm)<br>Computed | Δδ, ppm |
| 2                                    | C                               | -                                           | -                                       | -       |
| 3                                    | CH                              | 7.91                                        | 7.42                                    | 0.49    |
| 4                                    | CH                              | 7.31                                        | 7.13                                    | 0.18    |
| 5                                    | C                               | -                                           | -                                       | -       |
| 1 N'-COOCMe <sub>3</sub>             | (CH <sub>3</sub> ) <sub>3</sub> | 1.94                                        | 1.45                                    | 0.49    |
| 3'                                   | C                               | -                                           | -                                       | -       |
| 4'                                   | CH                              | 6.32                                        | 5.73                                    | 0.59    |
| 5'                                   | C                               | -                                           | -                                       | -       |
| 5'-Me                                | CH <sub>3</sub>                 | 2.22                                        | 2.25                                    | -0.03   |
| Mean Absolute Error (MAE) = 0.17     |                                 |                                             |                                         |         |
| Root Mean Square Error (RMSE) = 0.49 |                                 |                                             |                                         |         |

**Table S10:** Comparison of Experimental and Computed NMR data for compound **7**

| Compound <b>7</b>                    |                 |                                             |                                         |         |
|--------------------------------------|-----------------|---------------------------------------------|-----------------------------------------|---------|
| Carbon No.                           | Carbon Type     | <sup>1</sup> H-NMR (δ, ppm)<br>Experimental | <sup>1</sup> H-NMR (δ, ppm)<br>Computed | Δδ, ppm |
| 2                                    | C               | -                                           | -                                       | -       |
| 3                                    | CH              | 7.90                                        | 6.45                                    | 1.45    |
| 4                                    | CH              | 7.30                                        | 6.93                                    | 0.37    |
| 5                                    | C               | -                                           | -                                       | -       |
| 1'N                                  | NH              | 12.15                                       | 9.63                                    | 2.52    |
| 3'                                   | C               | -                                           | -                                       | -       |
| 4'                                   | CH              | 6.32                                        | 5.94                                    | 0.38    |
| 5'                                   | C               | -                                           | -                                       | -       |
| 5'-Me                                | CH <sub>3</sub> | 2.21                                        | 2.18                                    | 0.03    |
| Mean Absolute Error (MAE) = 0.28     |                 |                                             |                                         |         |
| Root Mean Square Error (RMSE) = 0.74 |                 |                                             |                                         |         |

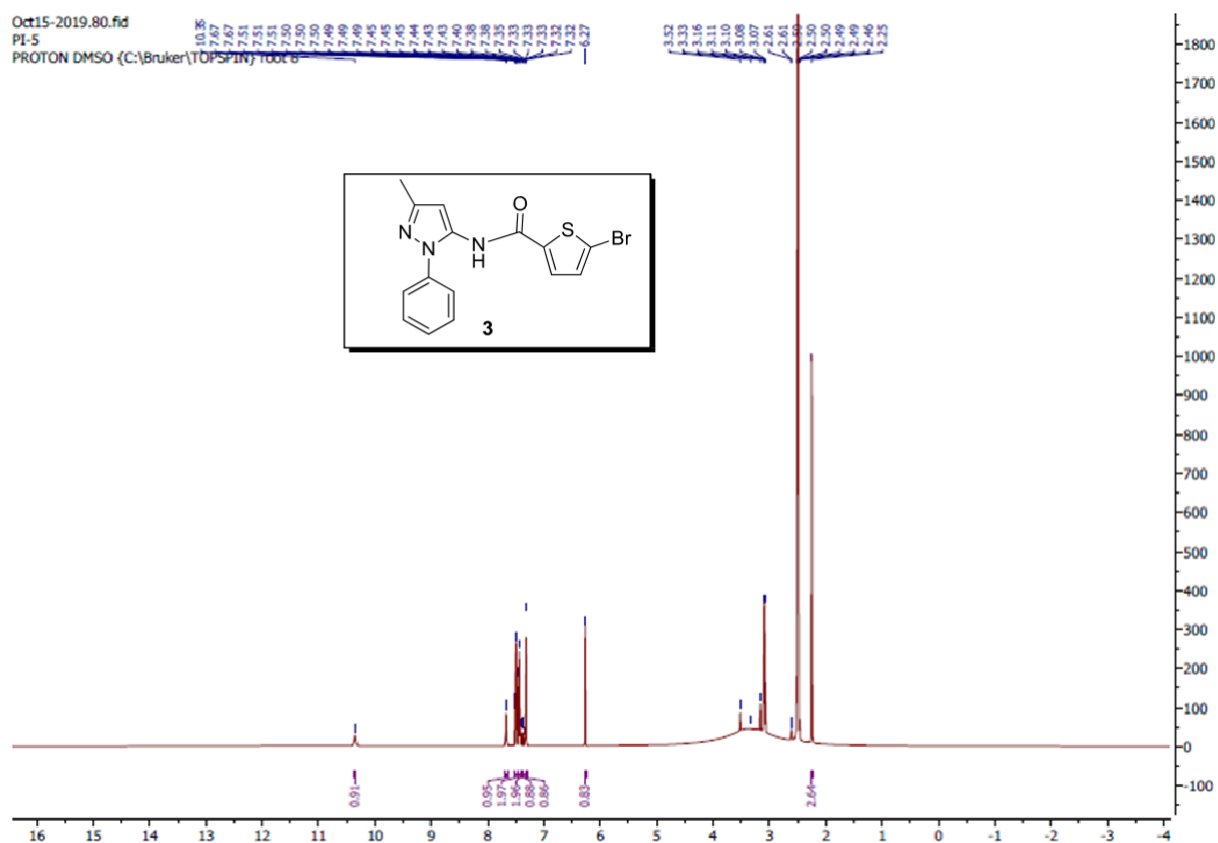

Figure S1:  $^1\text{H}$  NMR (600 MHz, DMSO) of compound 3.

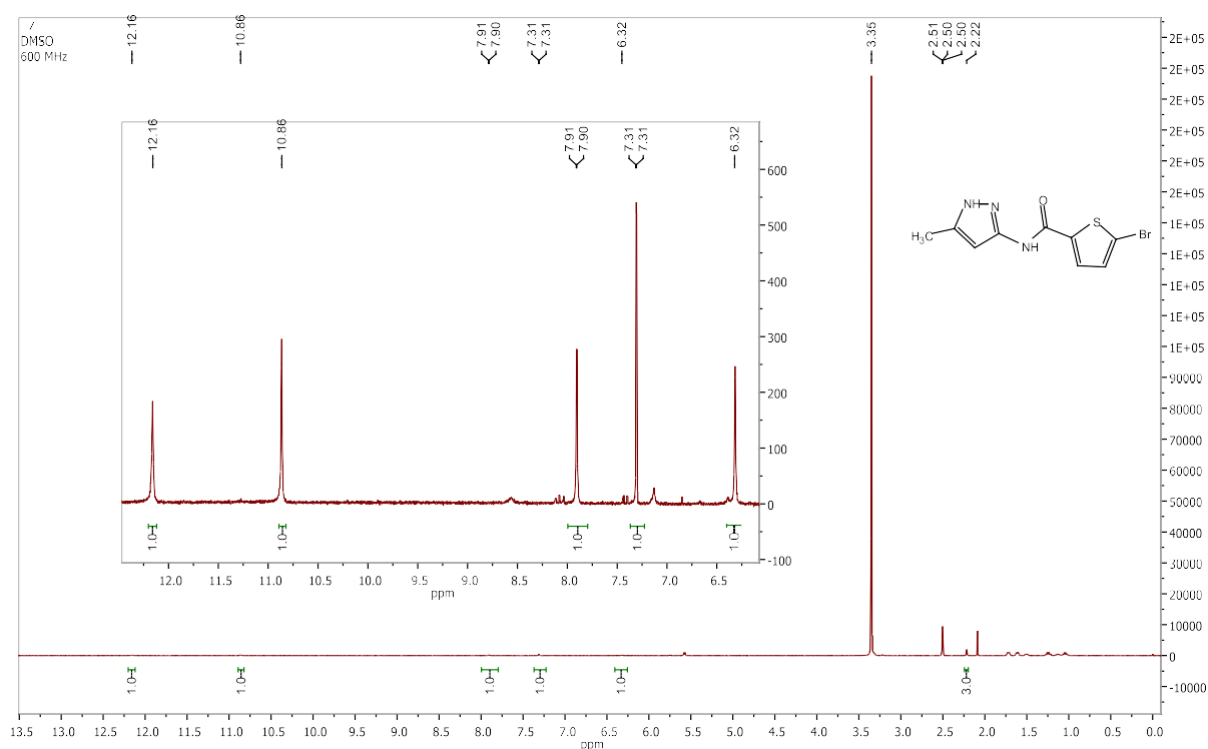

Figure S2:  $^1\text{H}$  NMR (600 MHz, DMSO) of compound 7

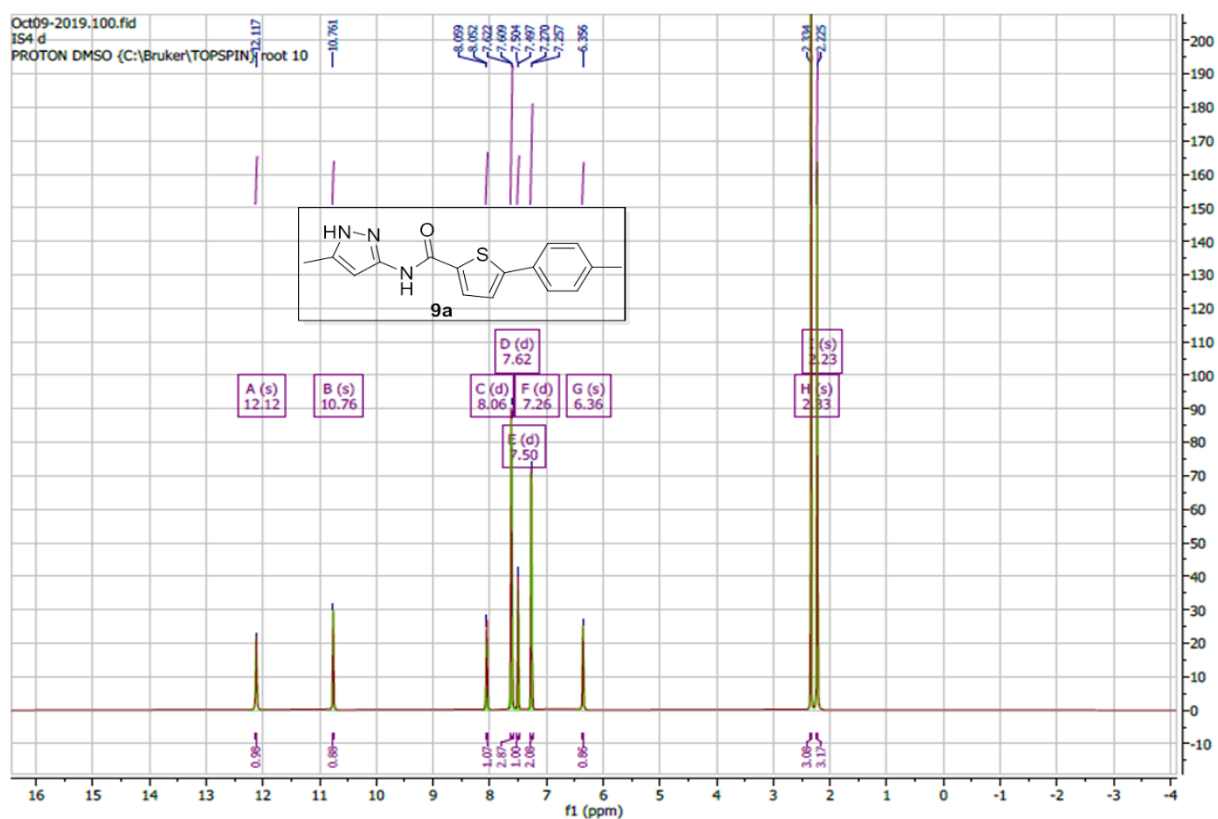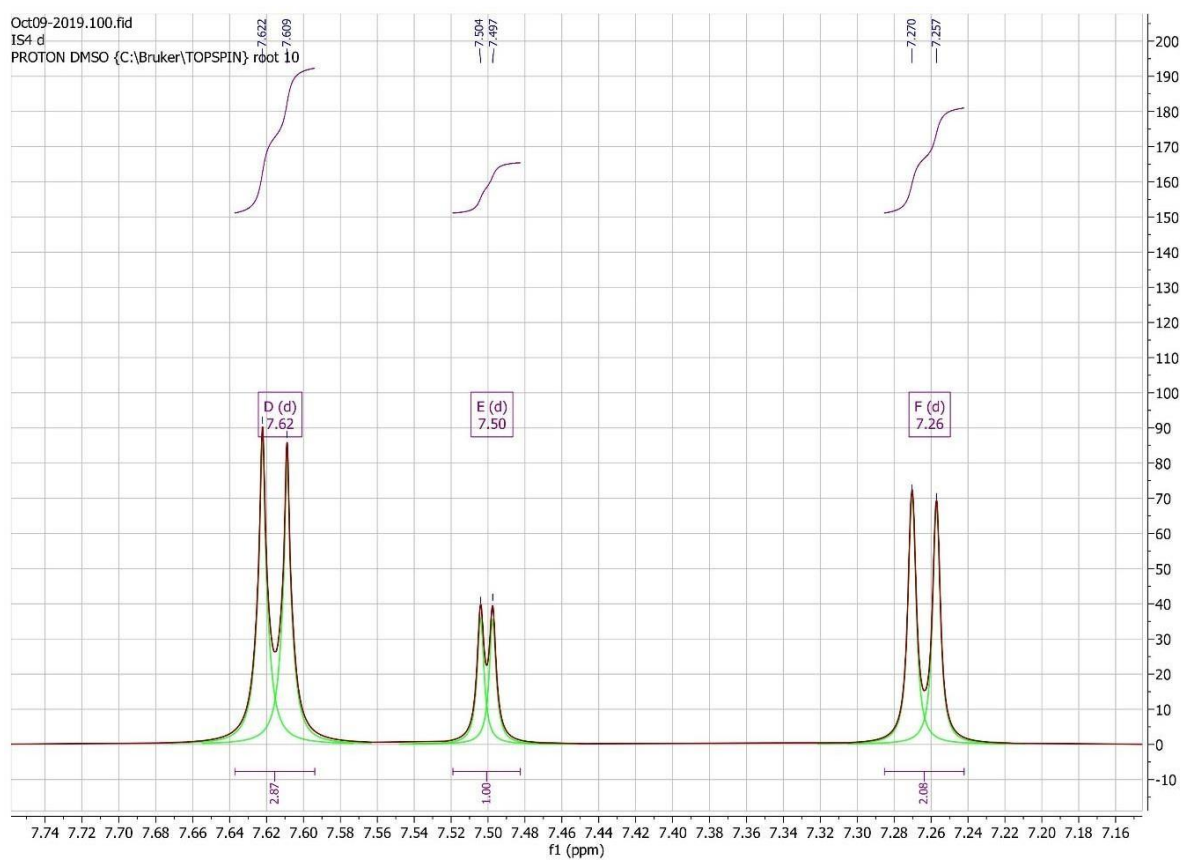

**Figure S3:**  $^1\text{H}$  NMR (600 MHz, DMSO) of compound 9a.

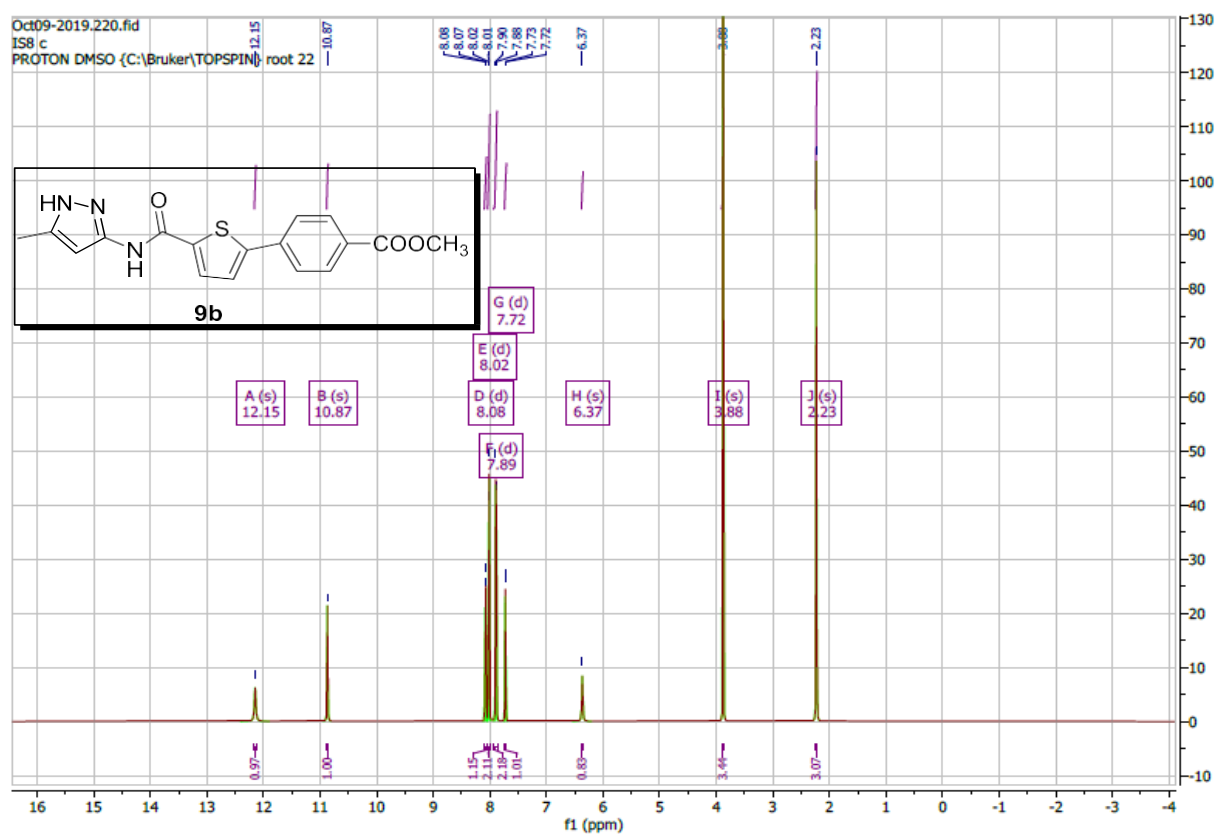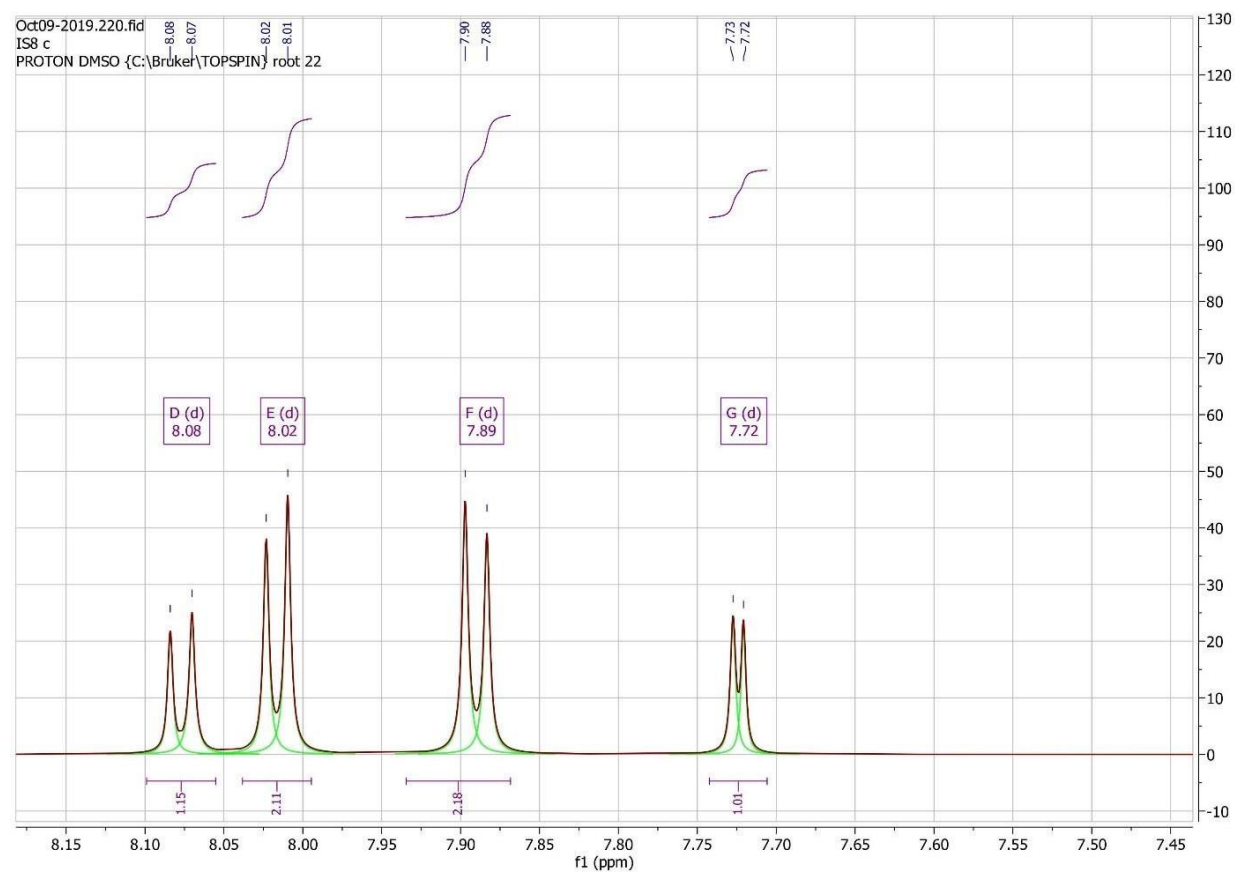

**Figure S4:**  $^1\text{H}$  NMR (600 MHz, DMSO) of compound 9b.

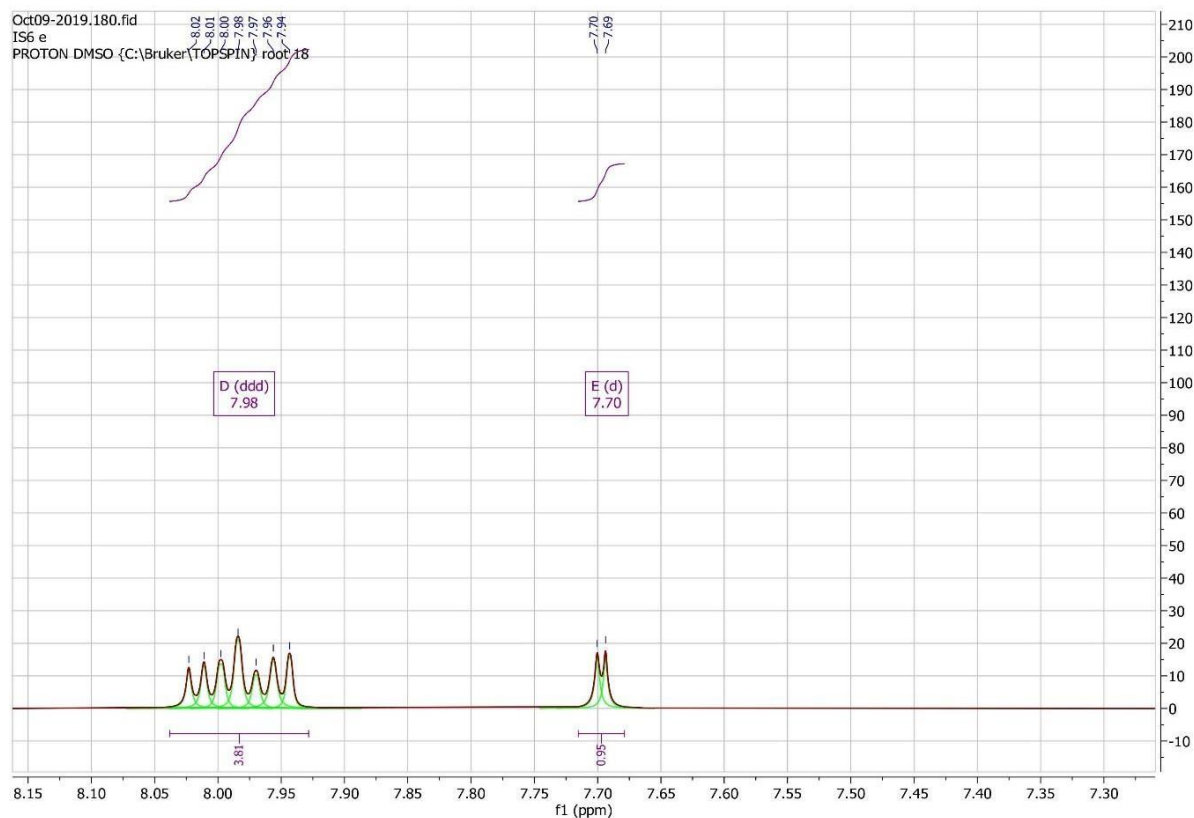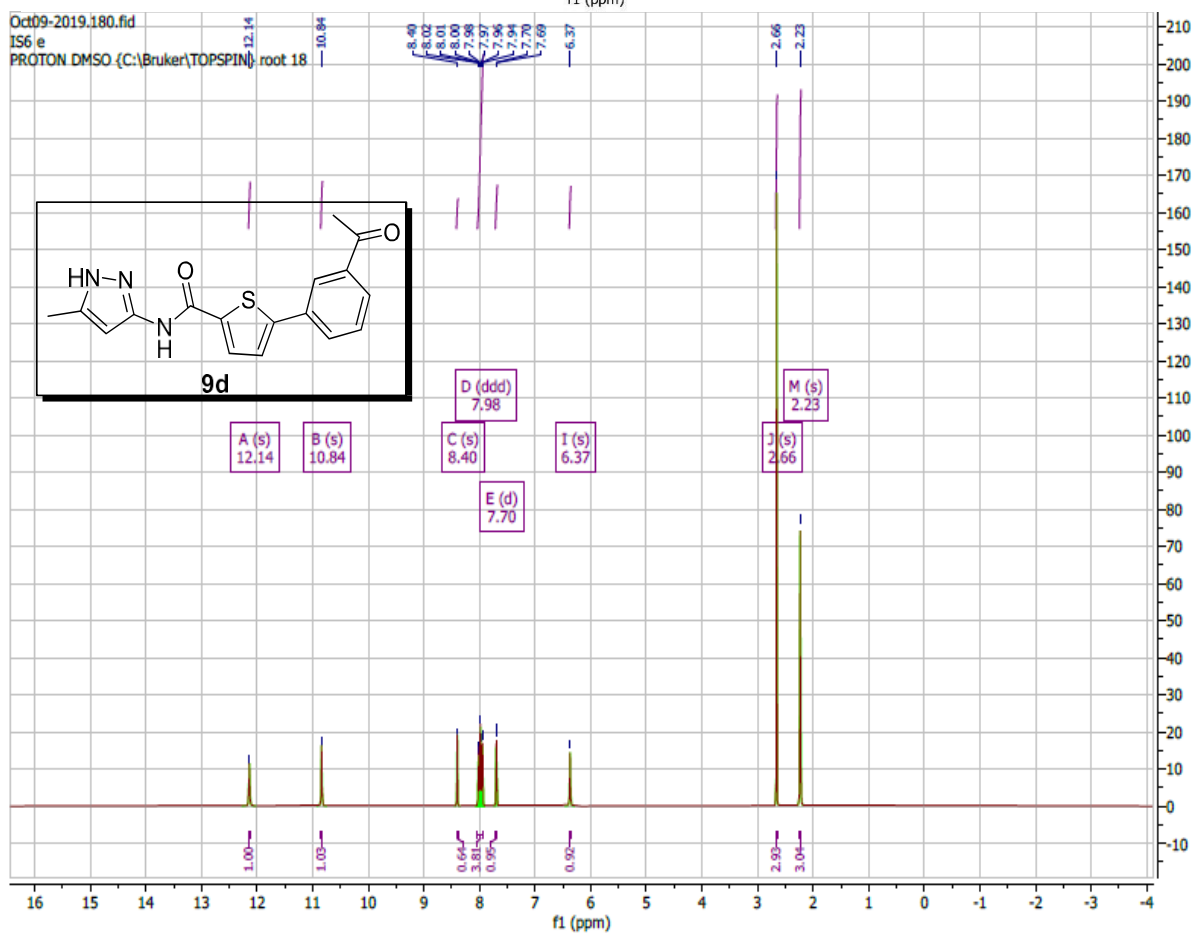

Figure S5:  $^1\text{H}$  NMR (600 MHz, DMSO) of compound 9d.

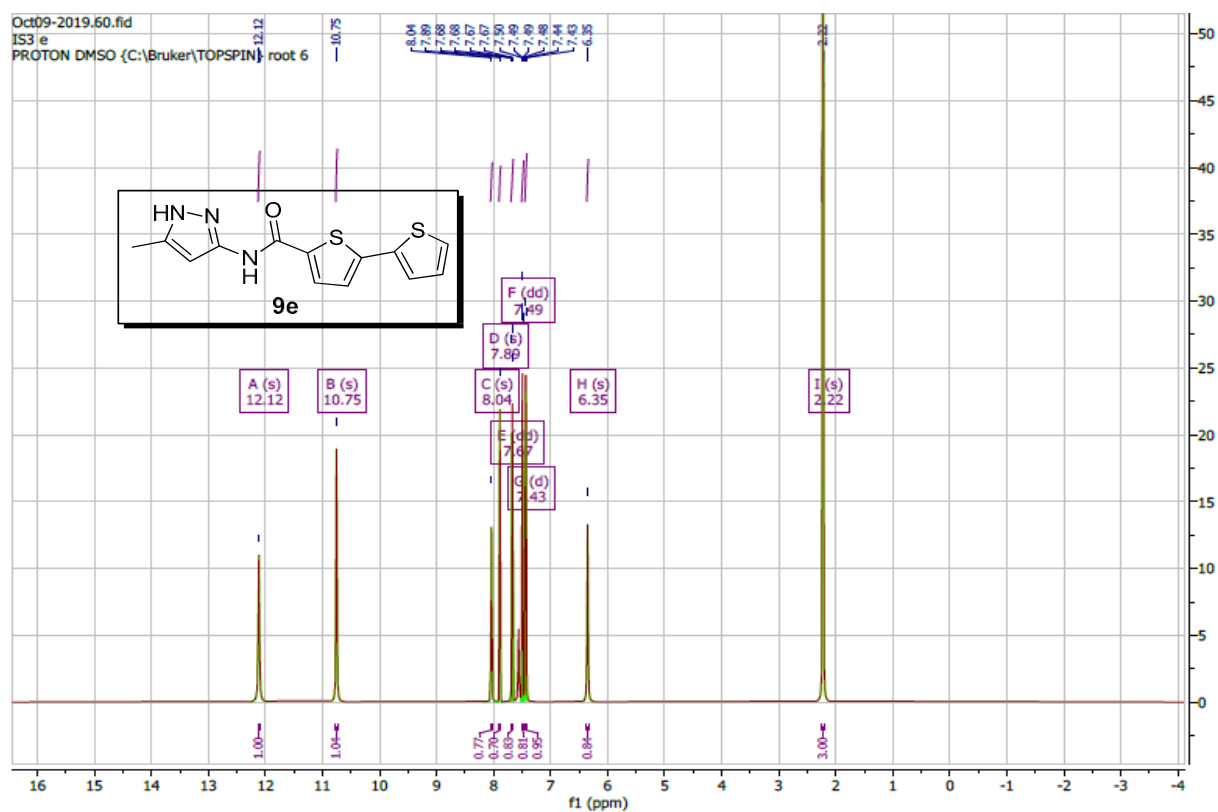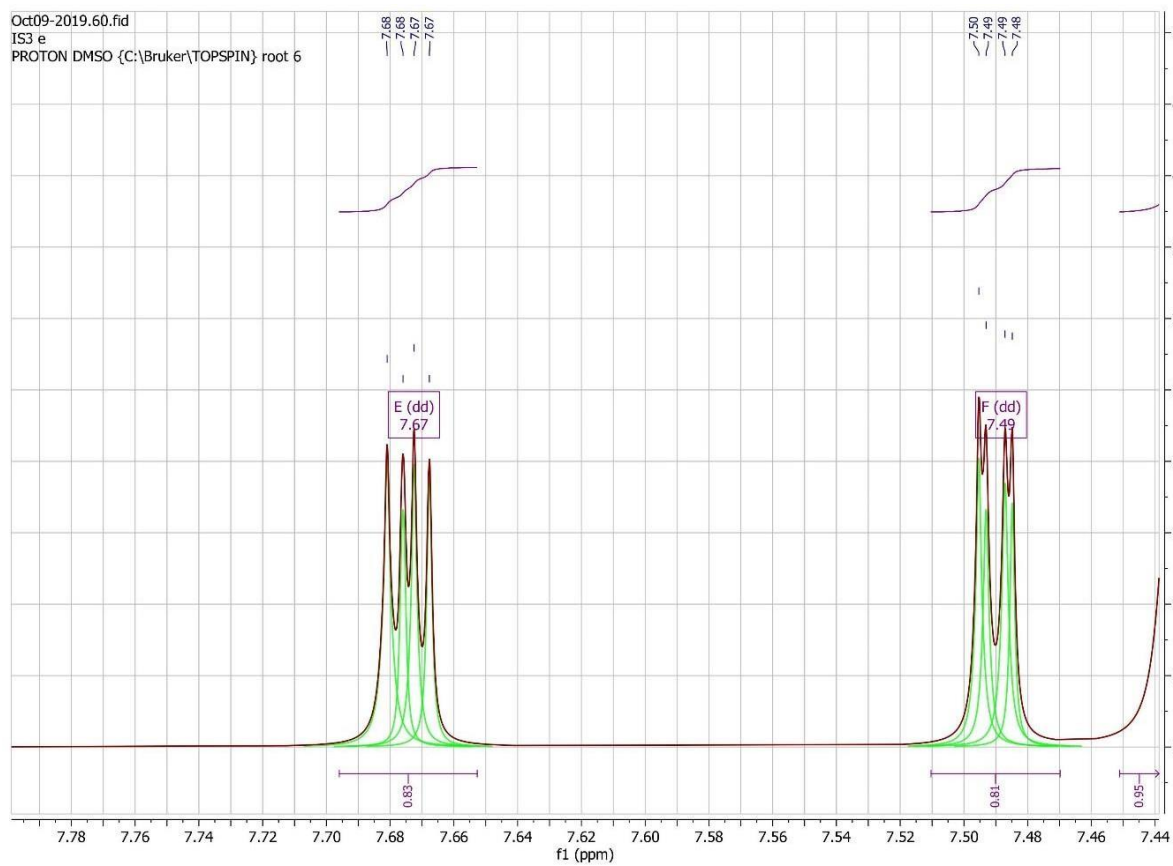

**Figure S6:**  $^1\text{H}$  NMR (600 MHz, DMSO) of compound 9e



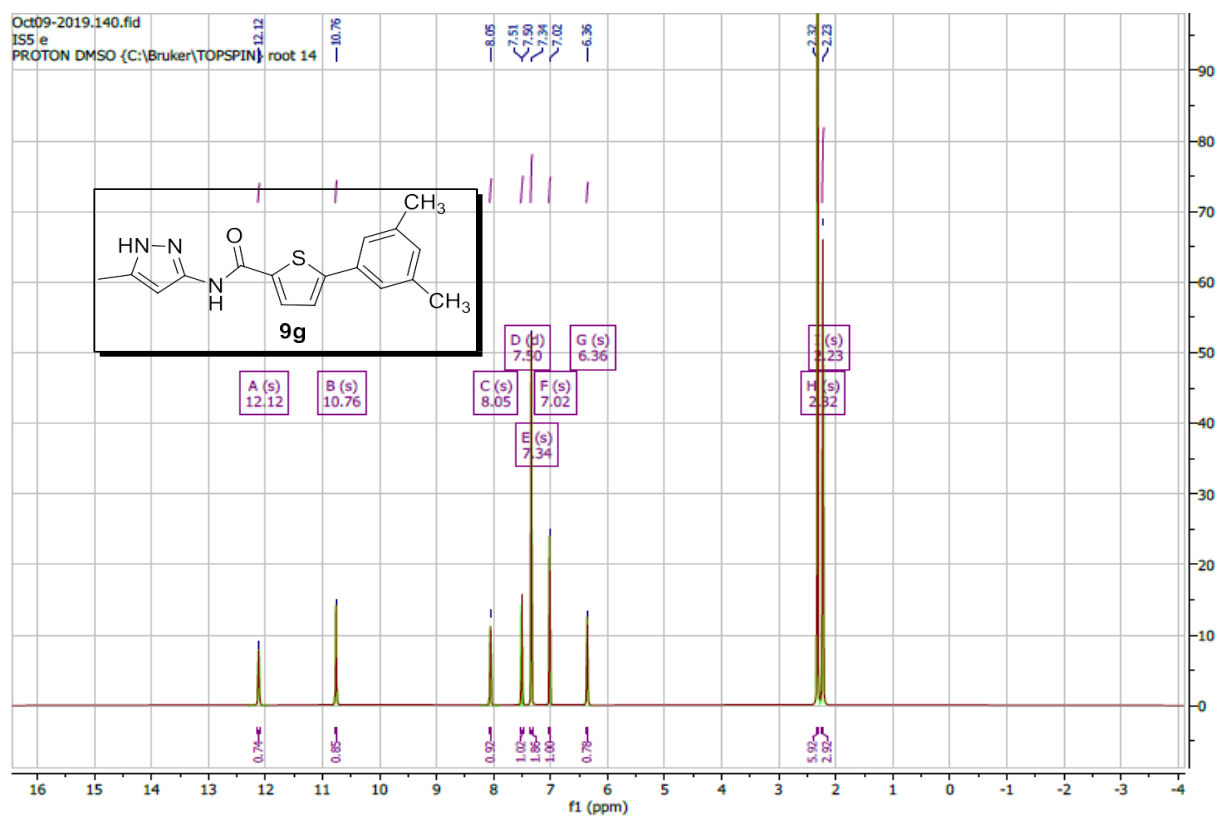

Figure S7:  $^1\text{H}$  NMR (600 MHz, DMSO) of compound 9g.

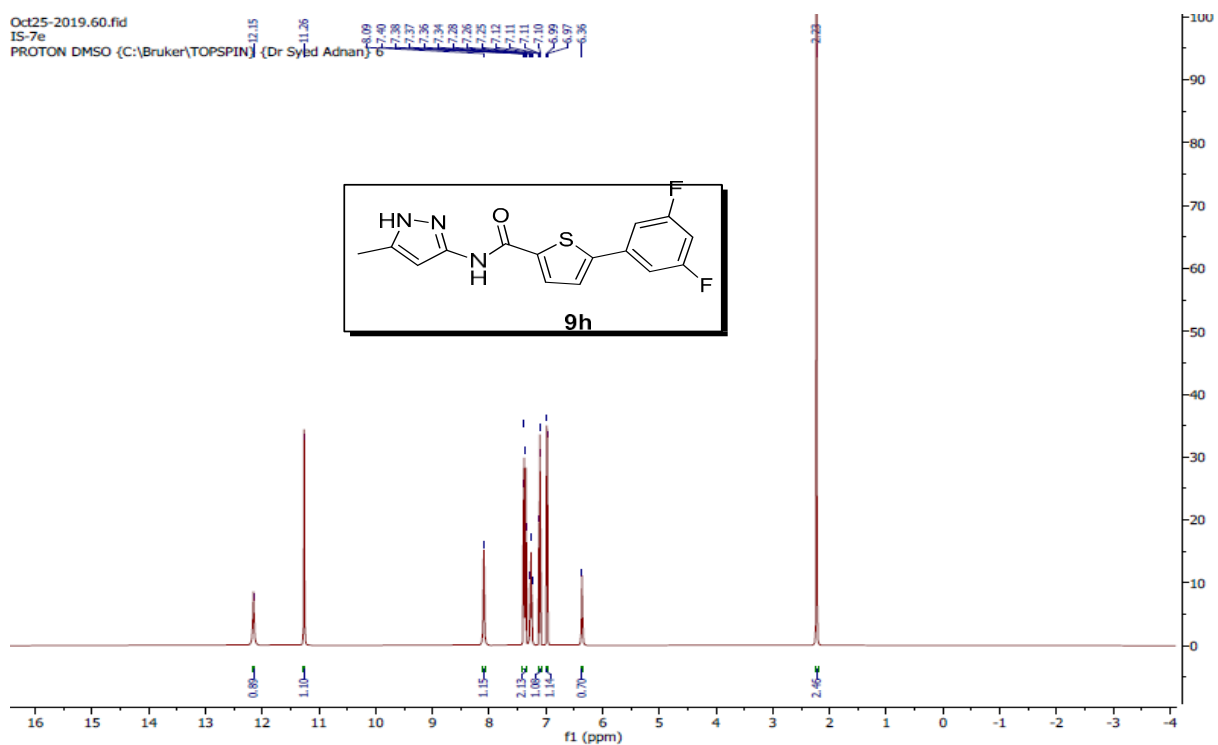

Figure S8:  $^1\text{H}$  NMR (600 MHz, DMSO) of compound 9h

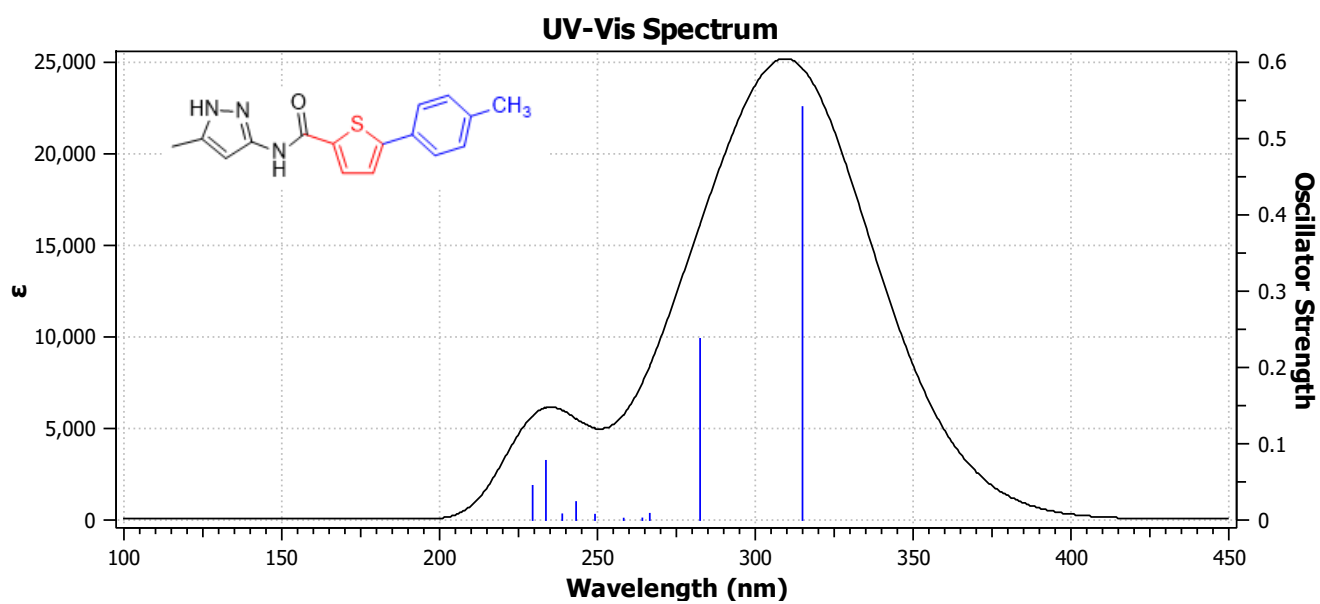

**Figure S9:** UV-Vis spectrum (Calculated at TD-DFT/PBE0/def2TZVPDMSO) of compound 9a

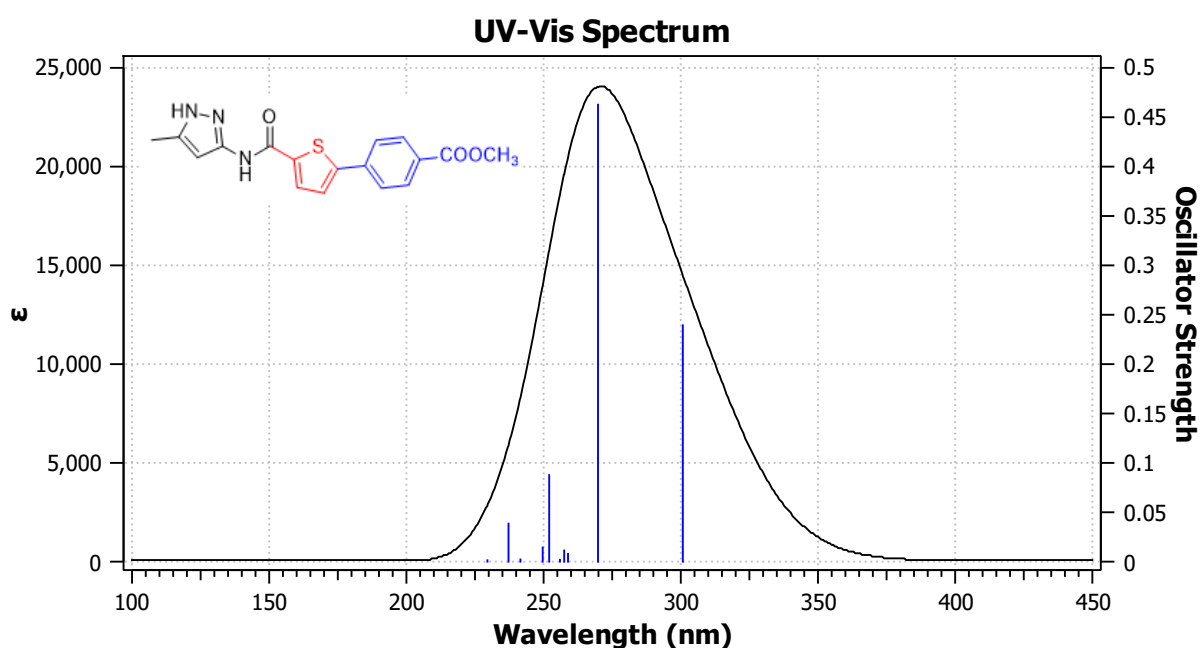

**Figure S10:** UV-Vis spectrum (Calculated at TD-DFT/PBE0/def2TZVPDMSO) of compound 9b

### Compound 9c

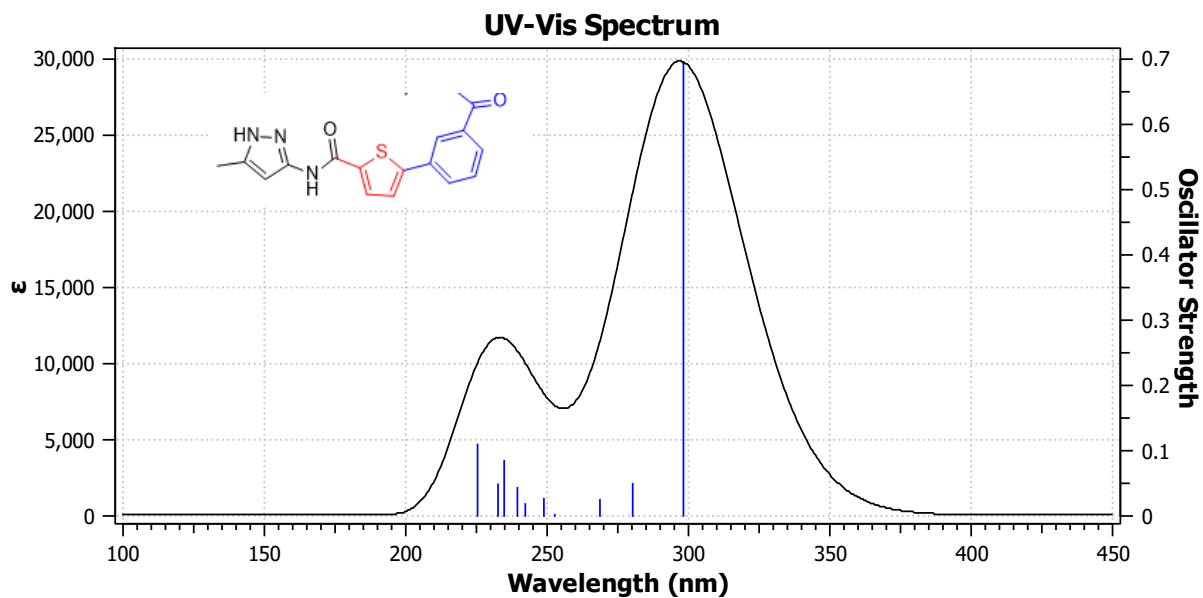

**Figure S11:** UV-Vis spectrum (Calculated at TD-DFT/PBE0/def2TZVPDMSO) of compound 9c

### Compound 9d

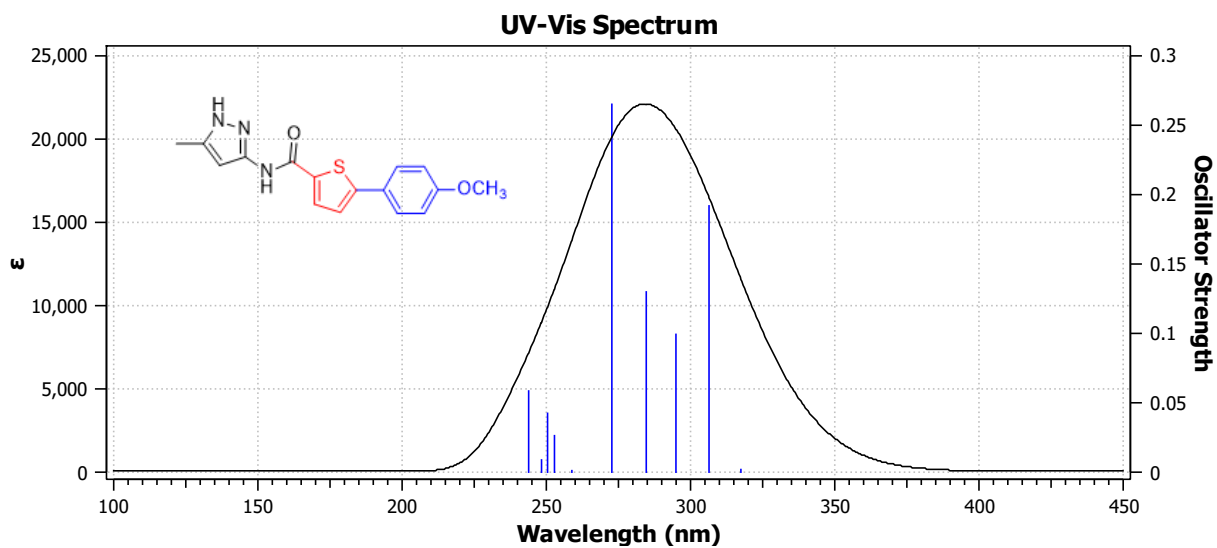

**Figure S12:** UV-Vis spectrum (Calculated at TD-DFT/PBE0/def2TZVPDMSO) of compound 9d

### Compound 9e

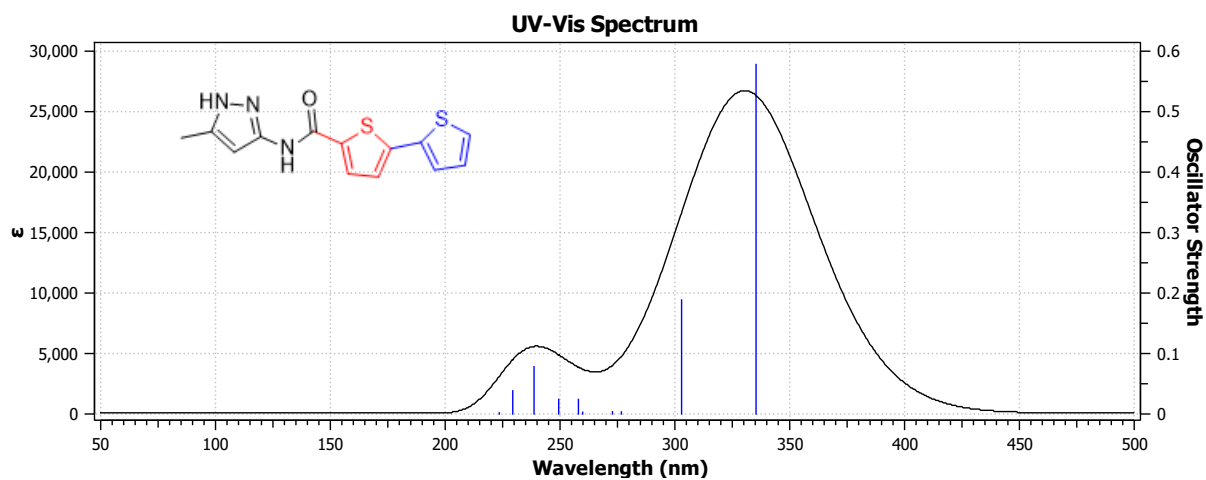

**Figure S13:** UV-Vis spectrum (Calculated at TD-DFT/PBE0/def2TZVPDMSO) of compound 9e

### Compound 9f

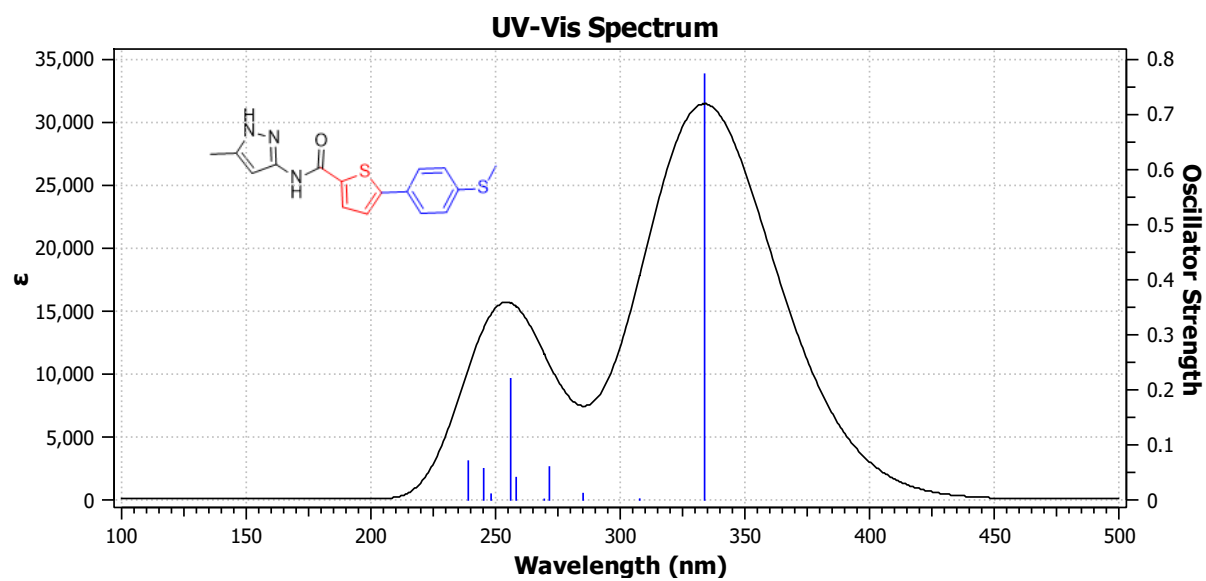

**Figure S14:** UV-Vis spectrum (Calculated at TD-DFT/PBE0/def2TZVPDMSO) of compound 9f

### Compound 9g

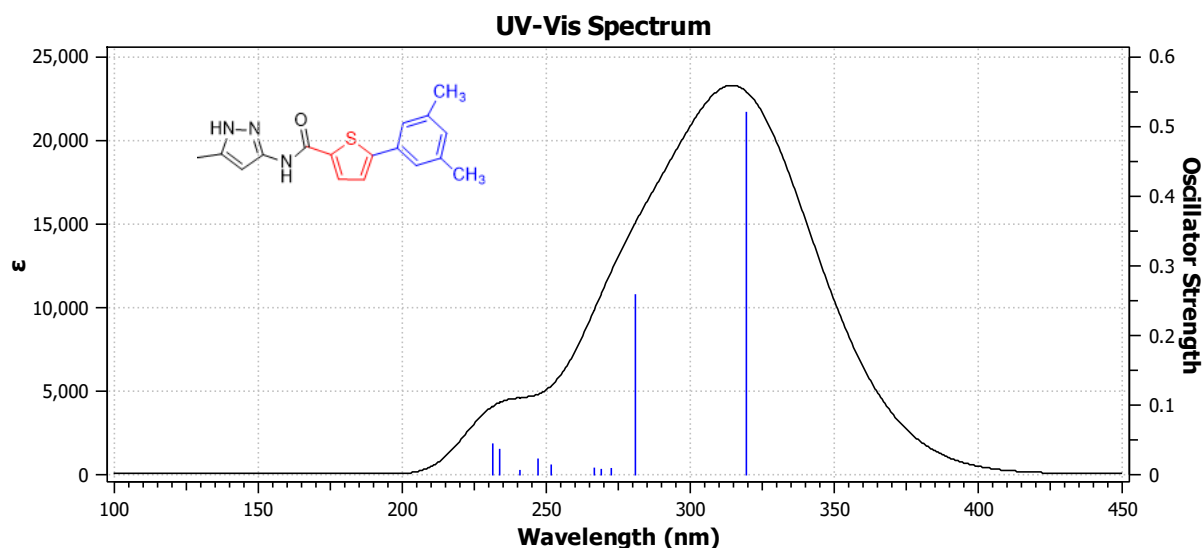

**Figure S15:** UV-Vis spectrum (Calculated at TD-DFT/PBE0/def2TZVPDMSO) of compound 9g

### Compound 9h

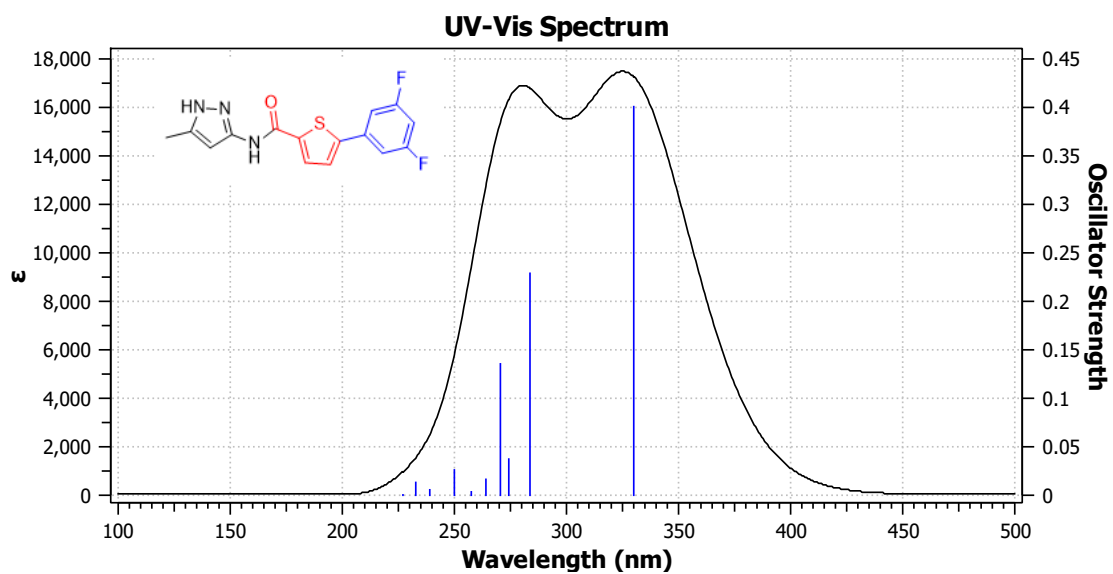

**Figure S16:** UV-Vis spectrum (Calculated at TD-DFT/PBE0/def2TZVPDMSO) of compound 9h

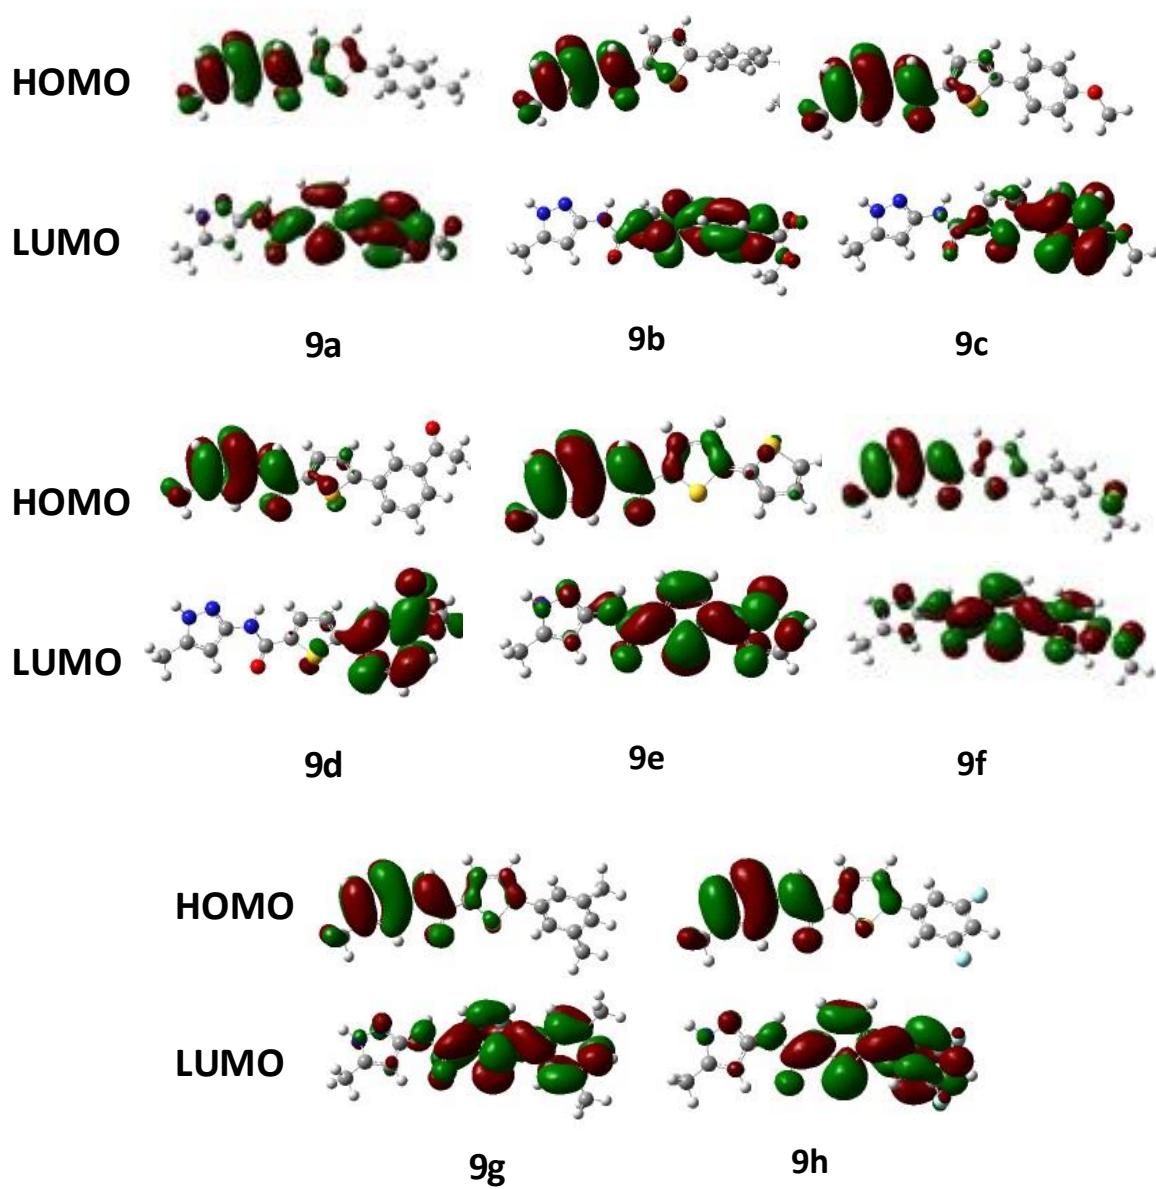

**Figure S17:** Representation of Frontier Orbitals of the Molecules
